# Supplementary material for: Trends and Determinants of Acute Tocolysis Utilization in Japan: A Nationwide Retrospective Cohort Study
Source: Research Square preprint supplement (doi:10.21203/rs.3.rs-7777057/v1), 2025-10-21
Supplement: Supplementary file 1 [file 6421675fdce10ab752483f57.xlsx]

## Sheet: Additional file 1
	Additional file 1. Annual trends in ritodrine hydrochloride administration duration
		2012	2013	2014	2015	2016	2017	2018	2019	2020	2021	2022	P*1
	≤2 days	0.15082	0.149374	0.154876	0.157884	0.155125	0.155928	0.18028	0.189437	0.204303	0.212508	0.222632	0.029
	3 day	0.0395106	0.0394433	0.0427661	0.0387785	0.0444932	0.0437386	0.0427699	0.0506602	0.0570812	0.055568	0.0617363	0.532
	4ｰ6 days	0.0994137	0.100873	0.102932	0.102013	0.0998797	0.104381	0.108364	0.114184	0.117136	0.120732	0.118063	0.815
	7ｰ13 days	0.176226	0.174242	0.172913	0.172477	0.172243	0.169724	0.17445	0.173457	0.172701	0.173566	0.166942	0.102
	14ｰ20 days	0.126434	0.128706	0.135819	0.133631	0.130296	0.128487	0.12543	0.118037	0.121392	0.113925	0.114117	0.004
	21ｰ27 days	0.100773	0.103426	0.0973869	0.0960681	0.102214	0.0974833	0.0958635	0.092707	0.0858259	0.0844678	0.0853488	0.036
	>=28 days	0.306823	0.303936	0.293308	0.299149	0.295749	0.300258	0.272842	0.261518	0.24156	0.239232	0.231161	0.036
	*1 Jonckheere-Terpstra

## Sheet: Additional file 2 
Additional file 2. Factors associated with infusion of ritodrine hydrochloride acute tocolysis by multivariate logistic regression analysis
	Odds ratio	95% CI*1		ｐ
		Lower	Upper
Preterm labor Management
Magnesium sulfate hydrate	0.906054	0.874079	0.939199	<0.001
Antenatal corticosteroids administration	1.00747	0.971677	1.04457	0.686875
Healthcare provision factors
Academic hospital	1.1603	1.12189	1.20002	<0.001
Perinatal medical center	1.118	1.08338	1.15373	<0.001
Region ref: Hokkaido-Tohoku				<0.001
Kyushu-Okinawa	1.79368	1.69595	1.89703	<0.001
Kansai	1.56434	1.49121	1.64106	<0.001
Kanto	1.37258	1.31277	1.43512	<0.001
Chugoku-Shikoku	1.28058	1.21607	1.34851	<0.001
Chubu	1.134	1.08202	1.18847	<0.001
Fiscal Year ref: 2012				<0.001
2013	0.986246	0.916203	1.06164	0.71253
2014	1.00512	0.937977	1.07706	0.884965
2015	1.02125	0.952382	1.0951	0.554962
2016	0.997378	0.929209	1.07055	0.942051
2017	1.01518	0.944685	1.09094	0.68154
2018	1.20777	1.12703	1.29429	<0.001
2019	1.24922	1.16942	1.33447	<0.001
2020	1.3813	1.29329	1.47531	<0.001
2021	1.46406	1.37184	1.56248	<0.001
2022	1.55164	1.45215	1.65794	<0.001
Maternal obstetrics complications
pPROM*2	3.17907	3.06343	3.29909	<0.001
Hypertensive disorders of pregnancy	1.52102	1.43172	1.6159	<0.001
Gestational age	1.13348	1.12928	1.13769	<0.001
Placenta previa	0.670122	0.634286	0.707983	<0.001
Multiple pregnancy	0.64	0.61	0.67	<0.001
Cervical insufficiency	1.03105	0.963934	1.10284	0.373254
*1 Confidence interval
*2 Preterm premature rupture of membranes

## Sheet: Additional file 3
Additional file 3. Changes in guidelines regarding tocolytic agents
Fiscal year	Description of tocolytic agents
2011	Ritodrine hydrochloride and magnesium sulfate are used as tocolytic agents. Serious side effects of ritodrine hydrochloride include pulmonary edema, granulocytopenia, and rhabdomyolysis. When administering for a long period, blood counts should be performed as appropriate, and attention should be paid to the occurrence of granulocytopenia.
2014	Ritodrine hydrochloride and magnesium sulfate are used as tocolytic agents. For both medications, follow the administration instructions and dosage on the package insert. Serious side effects of ritodrine hydrochloride include pulmonary edema, granulocytopenia, and rhabdomyolysis. When administering for a long period, blood counts should be performed as appropriate, and attention should be paid t…
2017	When administering tocolytics, attention should be paid to the onset of DVT if the patient is hospitalized and bed rested. Serious side effects of ritodrine hydrochloride include pulmonary edema, granulocytopenia, and rhabdomyolysis.When administering for a long period, blood counts should be performed as appropriate, and attention should be paid to the occurrence of granulocytopenia. In Japan, t…
2020	When administering tocolytics, attention should be paid to the onset of DVT if the patient is hospitalized and bed rested. Regarding the usefulness of ritodrine, continuous infusion of ritodrine for no more than 48 hours is supported only for the purpose of "administering one course of corticosteroids" or "transporting the mother to a facility capable of managing premature infants. "There is no e…
2023	When administering tocolytics, attention should be paid to the onset of DVT if the patient is hospitalized and bed rested. Ritodrine hydrochloride and magnesium sulfate hydrate are covered by insurance as tocolytics and are widely used in Japan. Regarding the usefulness of ritodrine, continuous infusion of ritodrine for no more than 48 hours is supported only for the purpose of "administering one…
